# Supplementary material
Source: publisher site journal article supplement (https://www.dovepress.com/article/572873)
Supplement: Supplementary file 1 [file 572873%20Revised%20Supplementary%20Table%201.docx]

**Supplementary table 1** LC-MS Identification of Major Constituents in ZGW Extract

| Number | Name | Molid | Formula | ppm | m/z | RT [min] | Reference Ion | Source |
| --- | --- | --- | --- | --- | --- | --- | --- | --- |
| 1 | Raffinose | MOL000841 | C18 H32 O16 | 0.11 | 503.1618 | 1.194 | [M-H]-1 | SDH |
| 2 | L-Ile | MOL000068 | C6 H13 N O2 | -0.4 | 132.10185 | 1.224 | [M+H]+1 | SZY,SY,LJJ,GBJ |
| 3 | Sucrose | MOL000842 | C12 H22 O11 | -0.32 | 341.1088 | 1.227 | [M-H]-1 | SDH |
| 4 | L-Xyl | MOL005447 | C5 H10 O5 | -0.84 | 195.05089 | 1.236 | [M+FA-H]-1 | SY |
| 5 | LDP | MOL005442 | C8 H11 N O2 | -0.57 | 154.08617 | 1.238 | [M+H]+1 | SY |
| 6 | Pca | MOL002321 | C5 H7 N O3 | 0.66 | 128.03543 | 1.257 | [M-H]-1 | SDH,LJJ,GBJ |
| 7 | MTL | MOL000003 | C6 H14 O6 | -0.07 | 181.07175 | 1.26 | [M-H]-1 | SDH |
| 8 | keto-L-fructose | MOL004048 | C6 H12 O6 | -0.17 | 179.05606 | 1.324 | [M-H]-1 | SZY |
| 9 | L-Valin | MOL000067 | C5 H11 N O2 | -0.34 | 118.08621 | 1.328 | [M+H]+1 | SY,LJJ,GBJ |
| 10 | 5-hydroxymethylfurfural | MOL000748 | C6 H6 O3 | -0.03 | 127.03891 | 1.369 | [M+H]+1 | SDH,NX |
| 11 | 2-furancarboxylicacid | MOL005482 | C5 H4 O3 | 1.28 | 111.00891 | 1.428 | [M-H]-1 | SZY |
| 12 | citric acid | MOL001456 | C6 H8 O7 | -0.06 | 191.01971 | 1.433 | [M-H]-1 | GQZ |
| 13 | Succinic acid | MOL000346 | C4 H6 O4 | 0.98 | 117.01945 | 1.917 | [M-H]-1 | SDH,NX |
| 14 | 3,4,5-trihydroxybenzoic acid | MOL000513 | C7 H6 O5 | 0.03 | 169.01425 | 2.25 | [M-H]-1 | SZY |
| 15 | PHA | MOL000041 | C9 H11 N O2 | 0.06 | 166.08626 | 2.886 | [M+H]+1 | SZY,SY |
| 16 | Swertiamarin | MOL003166 | C16 H22 O10 | -0.91 | 373.11368 | 3.02 | [M-H]-1 | SZY |
| 17 | Sumiki's acid | MOL001768 | C6 H6 O4 | 0.16 | 125.02334 | 3.201 | [M+H-H2O]+1 | SDH |
| 18 | D-Galacturonic acid, homopolymer | MOL000383 | C13 H16 O7 | 2.44 | 348.10663 | 4.43 | [M+ACN+Na]+1 | NX |
| 19 | Tauremisin | MOL005386 | C15 H20 O4 | 0.1 | 265.14349 | 4.776 | [M+H]+1 | SZY |
| 20 | FER | MOL000360 | C10 H10 O4 | -0.05 | 227.09142 | 4.811 | [M+H+MeOH]+1 | NX |
| 21 | Tryptophan | MOL001780 | C11 H12 N2 O2 | -0.45 | 205.09709 | 4.882 | [M+H]+1 | LJJ,GBJ |
| 22 | Vanillin | MOL000635 | C8 H8 O3 | -0.12 | 194.08115 | 4.976 | [M+ACN+H]+1 | SZY |
| 23 | Cistanoside F | MOL003696 | C21 H28 O13 | -1.17 | 487.14514 | 5.305 | [M-H]-1 | SDH |
| 24 | caffeic acid | MOL000223 | C9 H8 O4 | 0.01 | 179.03497 | 5.308 | [M-H]-1 | SZY |
| 25 | Purpureaside C | MOL003720 | C35 H46 O20 | 1.18 | 785.25189 | 5.437 | [M-H]-1 | SDH |
| 26 | PTL | MOL002379 | C15 H20 O3 | 0.5 | 249.14862 | 5.53 | [M+H]+1 | NX |
| 27 | 1H,3H-Pyrano(3,4-c)pyran-1-one, 5-ethenyl-6-(beta-D-glucopyranosyloxy)-4,4a,5,6-tetrahydro-, (4aS-(4aalpha,5beta,6alpha))- | MOL000650 | C10 H12 O4 | 0.03 | 197.08084 | 5.65 | [M+H]+1 | SZY |
| 28 | Scopoletin | MOL000040 | C10 H8 O4 | 0.02 | 193.04951 | 6.109 | [M+H]+1 | GQZ |
| 29 | Acteoside | MOL003333 | C29 H36 O15 | 0.45 | 623.19843 | 6.235 | [M-H]-1 | SDH |
| 30 | Hyperin | MOL004368 | C21 H20 O12 | 0.53 | 465.103 | 6.308 | [M+H]+1 | TSZ,NX |
| 31 | Jionoside B1 | MOL003715 | C37 H50 O20 | 0.92 | 813.28302 | 6.337 | [M-H]-1 | SDH |
| 32 | Vanirom | MOL005550 | C9 H10 O3 | 0.15 | 165.05574 | 6.355 | [M-H]-1 | SZY |
| 33 | Rutin | MOL000415 | C27 H30 O16 | -0.29 | 609.14587 | 6.648 | [M-H]-1 | GQZ,NX |
| 34 | Quercetin | MOL000098 | C15 H10 O7 | 0.09 | 303.04996 | 6.654 | [M+H]+1 | TSZ,NX,GQZ |
| 35 | Scoparone | MOL001999 | C11 H10 O4 | -0.28 | 207.06512 | 6.728 | [M+H]+1 | NX |
| 36 | Coumarin | MOL000431 | C9 H6 O2 | 0.08 | 147.04407 | 6.83 | [M+H]+1 | SZY |
| 37 | Jioglutoside B_qt | MOL003713 | C11 H14 O4 | -0.09 | 211.09647 | 6.935 | [M+H]+1 | SDH |
| 38 | Cornuside | MOL005546 | C24 H30 O14 | -0.4 | 541.15601 | 6.94 | [M-H]-1 | SZY |
| 39 | GRO | MOL005484 | C9 H10 O2 | 0.25 | 151.07539 | 6.985 | [M+H]+1 | SZY |
| 40 | Daidzein | MOL000390 | C15 H10 O4 | 0.06 | 255.0652 | 7 | [M+H]+1 | NX |
| 41 | methyl carboxylate | MOL003712 | C23 H34 O13 | -4.01 | 519.20514 | 7.121 | [M+H]+1 | SDH |
| 42 | (2S,3S,3aR)-3a-allyl-2-(1,3-benzodioxol-5-yl)-5-methoxy-3-methyl-2,3-dihydrobenzofuran-6-one | MOL005437 | C20 H20 O5 | -0.43 | 341.13821 | 7.328 | [M+H]+1 | SY |
| 43 | 3-OCTEN-2-ONE | MOL000713 | C8 H14 O | 0.13 | 109.10111 | 7.361 | [M+H-H2O]+1 | NX |
| 44 | Hydroxygenkwanin | MOL005530 | C16 H12 O6 | 0.85 | 299.05637 | 7.816 | [M-H]-1 | SZY |
| 45 | aeginetic acid | MOL003689 | C15 H24 O4 | 0.08 | 291.15671 | 7.894 | [M+Na]+1 | SDH |
| 46 | (7aR)-4,4,7a-trimethyl-6,7-dihydro-5H-benzofuran-2-one | MOL004741 | C11 H16 O2 | -0.35 | 203.1042 | 8.088 | [M+Na]+1 | SZY |
| 47 | Eugenone | MOL005515 | C13 H16 O5 | -0.45 | 233.0818 | 8.283 | [M-H-H2O]-1 | SZY |
| 48 | 3-[2-(3-hydroxyphenyl)ethyl]-5-methoxyphenol | MOL005444 | C15 H16 O3 | 0.07 | 245.11731 | 8.619 | [M+H]+1 | SY |
| 49 | Anethole | MOL000475 | C10 H12 O | -0.09 | 181.12228 | 8.919 | [M+H+MeOH]+1 | SZY |
| 50 | benzyl ethyl alcohol | MOL001300 | C8 H10 O | 0.56 | 155.10674 | 9.101 | [M+H+MeOH]+1 | SZY |
| 51 | Styrone | MOL002225 | C9 H10 O | 0.47 | 135.08055 | 9.369 | [M+H]+1 | GQZ |
| 52 | Anisylacetone | MOL005561 | C11 H14 O2 | 0.01 | 201.08859 | 9.391 | [M+Na]+1 | SZY |
| 53 | Rehmaionoside C | MOL003725 | C19 H32 O8 | 0.26 | 411.19904 | 9.608 | [M+Na]+1 | SDH |
| 54 | Batatasin I | MOL005443 | C17 H16 O4 | 0.48 | 285.11227 | 9.843 | [M+H]+1 | SY |
| 55 | oleanolic acid | MOL000263 | C30 H48 O3 | 0.21 | 439.35715 | 10.984 | [M+H-H2O]+1 | SZY,NX |
| 56 | methyl (1R,4aS,6S,7R,7aS)-1,6-dihydroxy-7-methyl-1,4a,5,6,7,7a-hexahydrocyclopenta[d]pyran-4-carboxylate | MOL001681 | C11 H16 O5 | 0.42 | 227.09259 | 11.534 | [M-H]-1 | SZY |
| 57 | 1-Acetyl-4,6,8-trimethylazulene | MOL005474 | C15 H16 O | 0.06 | 213.12741 | 11.589 | [M+H]+1 | SZY |
| 58 | Loganin | MOL001680 | C17 H26 O10 | 0.31 | 373.14932 | 11.748 | [M+H-H2O]+1 | SZY |
| 59 | 4-(4-ethylphenyl)benzoic acid | MOL005490 | C15 H14 O2 | 0.14 | 227.1067 | 11.78 | [M+H]+1 | SZY |
| 60 | beta-ionone | MOL002363 | C13 H20 O | -0.31 | 193.1586 | 12.002 | [M+H]+1 | GQZ |
| 61 | Glucosol | MOL005508 | C30 H48 O4 | 0.21 | 471.34808 | 13.13 | [M-H]-1 | SZY |
| 62 | 7-Hydroxycadalene | MOL005498 | C15 H18 O | -0.46 | 215.14294 | 13.377 | [M+H]+1 | SZY |
| 63 | PENTYLFURAN | MOL000668 | C9 H14 O | 0.17 | 277.21625 | 13.867 | [2M+H]+1 | TSZ |
| 64 | Pinoresinol | MOL001842 | C20 H22 O6 | 0.53 | 381.13107 | 14.016 | [M+Na]+1 | TSZ |
| 65 | Linoleic | MOL000749 | C18 H32 O2 | 0.79 | 313.27405 | 14.365 | [M+H+MeOH]+1 | SZY,GQZ |
| 66 | Methylcimicifugoside_qt | MOL005463 | C38 H56 O11 | -0.51 | 687.37463 | 15.518 | [M-H]-1 | SY |
| 67 | Betulonic acid | MOL001996 | C30 H46 O3 | 0.32 | 477.33405 | 17.983 | [M+Na]+1 | SZY |
| 68 | (+)-alpha-Curcumene | MOL000890 | C15 H22 | 0.15 | 203.17946 | 18.167 | [M+H]+1 | SZY |
| 69 | ethyl linolenate | MOL001495 | C20 H34 O2 | -0.11 | 307.26312 | 18.524 | [M+H]+1 | SZY,GQZ |
| 70 | Farnesylacetone | MOL000878 | C18 H30 O | 0.04 | 263.23697 | 18.721 | [M+H]+1 | GQZ |
| 71 | 13-Tetradecenyl acetate | MOL005272 | C16 H30 O2 | 0.03 | 277.21381 | 19.005 | [M+Na]+1 | SZY |
| 72 | Linolenyl alcohol | MOL005538 | C18 H32 O | 0.09 | 265.25256 | 19.519 | [M+H]+1 | SZY |
| 73 | methyl palmitate | MOL000879 | C17 H34 O2 | -0.25 | 269.24854 | 19.709 | [M-H]-1 | SZY,GQZ,NX |
| 74 | 2-Monopalmitin | MOL005553 | C19 H38 O4 | -0.12 | 313.2738 | 19.738 | [M+H-H2O]+1 | SZY |
| 75 | Linolenate | MOL005500 | C18 H30 O2 | 0.14 | 279.2319 | 19.87 | [M+H]+1 | SZY |
| 76 | palmitic acid | MOL000069 | C16 H32 O2 | 0.07 | 255.23297 | 20.011 | [M-H]-1 | SZY,GQZ,NX |
| 77 | Amide HPL | MOL001816 | C16 H33 N O | 0.12 | 256.26352 | 20.264 | [M+H]+1 | SZY |
| 78 | Palmatine | MOL000785 | C21 H22 Cl N O4 | 3.47 | 388.13235 | 20.418 | [M+H]+1 | NX |
| 79 | ELD | MOL001746 | C18 H35 N O | 0.44 | 282.27927 | 20.994 | [M+H]+1 | SZY |
| 80 | Mandenol | MOL001494 | C20 H36 O2 | 0.24 | 331.26089 | 21.355 | [M+Na]+1 | SZY,GQZ |
| 81 | Stearamide | MOL003940 | C18 H37 N O | -0.64 | 284.29459 | 21.396 | [M+H]+1 | SZY |
| 82 | alpha-amyrin | MOL000520 | C30 H50 O | 0.73 | 409.38297 | 22.438 | [M+H-H2O]+1 | SZY |
| 83 | 24-Methylenecycloartanol | MOL001901 | C31 H52 O | 0.06 | 423.39853 | 23.099 | [M+H-H2O]+1 | GQZ |
| 84 | methyl 9,10-methylene-hexadecanoate | MOL003697 | C18 H34 O2 | 0.22 | 281.24866 | 23.155 | [M-H]-1 | SDH |
| 85 | Ethylpalmitate | MOL000971 | C18 H36 O2 | 0.12 | 283.26429 | 25.013 | [M-H]-1 | SZY,GQZ |
| 86 | Ethyl oleate (NF) | MOL002883 | C20 H38 O2 | 0.4 | 309.28003 | 25.52 | [M-H]-1 | SZY |
| 87 | ERUCAMIDE | MOL001403 | C22 H43 N O | 0.14 | 360.32371 | 25.851 | [M+Na]+1 | SZY |
| 88 | Stigmasterol | MOL000449 | C29 H48 O | -0.14 | 395.36716 | 26.008 | [M+H-H2O]+1 | SZY,SY,GQZ,SDH,NX |
| 89 | Pellitorin | MOL001618 | C22 H42 O2 | 0.03 | 361.30774 | 26.013 | [M+Na]+1 | SZY,SY |
| 90 | ethyl stearate | MOL001498 | C20 H40 O2 | 0.03 | 311.29556 | 27.176 | [M-H]-1 | GQZ |
| 91 | Dehydromevalonic lactone | MOL005549 | C6 H8 O2 | -0.33 | 113.05967 | 27.724 | [M+H]+1 | SZY |

**Notes:** PPM: Unit for mass relative error in mass spectrometry. RT: Retention time of compounds during chromatographic separation. m/z: Ratio of the ion mass to the charge number. [M+H]⁺/[M–H] ⁻: Symbols for protonated/deprotonated molecular ions.
